# Supplementary material for: Antigenic and immunogenic evaluation of permutations of soluble hepatitis C virus envelope protein E2 and E1 antigens
Source: PubMed Central journal article supplement (PMC8323887; doi:10.1371/journal.pone.0255336), 2021-07-30

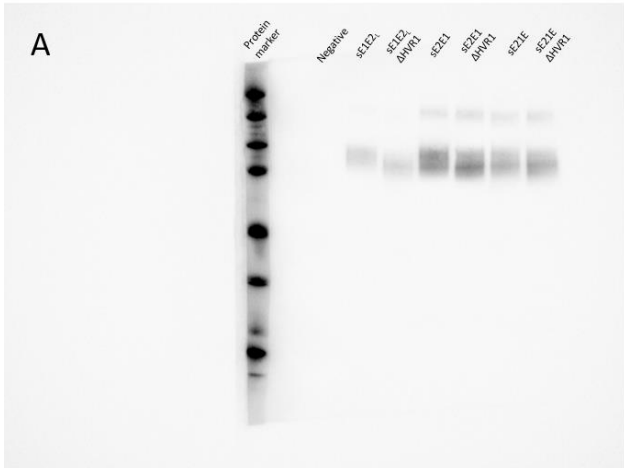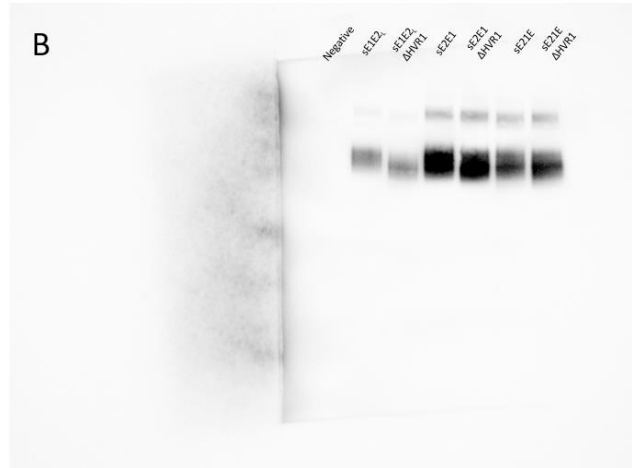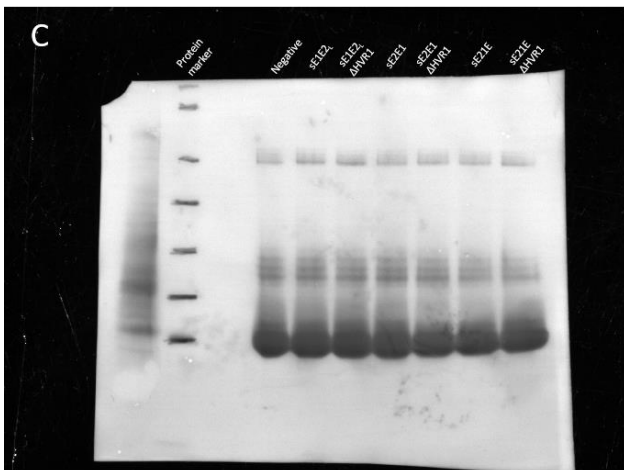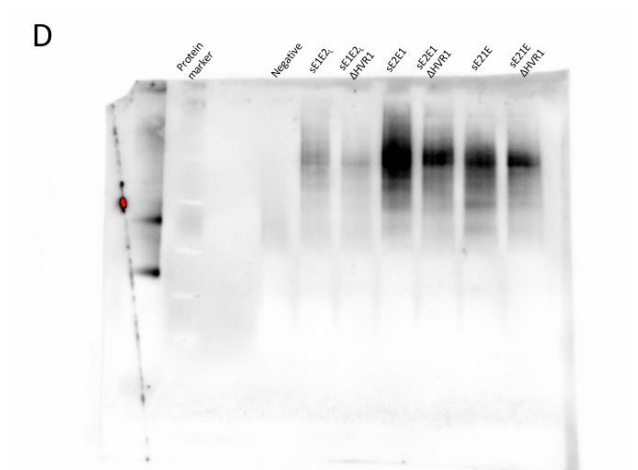

Supplement: pone.0255336.s001.pdf [file pone.0255336.s001.pdf]
